# Supplementary material
Source: ML conference proceedings conference paper supplement (https://proceedings.neurips.cc/paper_files/paper/2023/hash/1bd8cfc0e4c53869b7f1d0ed4b1e78e1-Abstract.html)
Supplement: Supplementary file 1 [file 1bd8cfc0e4c53869b7f1d0ed4b1e78e1-Supplemental-Conference.zip]

Archive with 4 entries (4 files):
- GIPPO.mp4
- __MACOSX/._GIPPO.mp4
- Appendix.pdf
- __MACOSX/._Appendix.pdf
